# Supplementary material for: Block poly(arylene ether sulfone) copolymers tethering aromatic side-chain quaternary ammonium as anion exchange membranes
Source: Royal Society of Chemistry journal article supplement (doi:10.1039/c7py01558e), 2017-12-18
Supplement: c7py01558e1.pdf [file c7py01558e1.pdf]

## Supplementary information

Block poly(arylene ether sulfone) copolymers tethering aromatic side-chain  
quaternary ammonium as anion exchange membranes

Xueliang Zhang <sup>a</sup>, Qian Shi <sup>a</sup>, Pei Chen <sup>a\*</sup>, Jinfang Zhou <sup>a</sup>, Songsong Li <sup>a</sup>, Hua Xu <sup>a</sup>, Xinbing Chen <sup>a\*</sup>,  
Zhongwei An <sup>a,b</sup>

<sup>a</sup> Key Laboratory of Applied Surface and Colloid Chemistry (MOE); Shaanxi Key Laboratory for  
Advanced Energy Devices; School of Materials Science and Engineering, Shaanxi Normal  
University, Xi'an 710119, PR China

<sup>b</sup> Xi'an Modern Chemistry Research Institute, Xi'an 710065, PR China

Corresponding E-mail: chenxinbing@snnu.edu.cn (X. Chen); chenpei@snnu.edu.cn (P. Chen)

## 1. Experimental Part

### Synthesis of DFDM

2,6-Difluorophenyl [3-[(3,5-dimethyl phenyl) methyl]-5-methylphenyl] methanone (DFDM) was prepared according to our reported method,<sup>36</sup> the procedure is as follows.

25.91 g of 1-bromo-3,5-dimethylbenzene (0.14 mol) in 100 mL absolute diethyl ether was dropwised slowly into 100 mL absolute diethyl ether containing 3.41 g of magnesium (0.14 mol) under N<sub>2</sub> protection to prepare 3,5-dimethylphenyl magnesium bromide. Then 100 mL of absolute diethyl ether solution of 2,6-difluorobenzonitrile (19.47 g, 0.14 mol) was added slowly with stirring and refluxing. After completion of the reaction, the system was quenched by 80 mL of 0.1 M HCl solution. The separated ether layer was hydrolysed at reflux for 6 h with 1 M HCl solution, then washed to neutral. The obtained crude product was distilled to obtain 5-(2,6-difluorobenzyl)-1,3-dimethylbenzene (DFDB).

To 50 mL of chloroform, 0.50 g of DFDB (2.03 mmol), 1.23 g of *N*-bromosuccinimide (6.90 mmol) and 0.06 g of 2,2-azobisisobutyronitrile (0.37 mmol) were added under stirring and refluxed for 4.5 h. Then the solvent was evaporated and the residue was purified via column chromatography (petroleum ether/ethyl acetate (PE/EA) of 100/1) to give 5-(2,6-difluorobenzyl)-1-methyl-3-bromomethyl benzene (DFMBB).

To a solution mixture of tetrahydrofuran (72 mL) and distilled water (24 mL), 1.00 g of DFMBB (3.08 mmol), 0.80g of 3,5-dimethylphenylboronic acid (5.33 mmol), 0.70 g of sodium carbonate (6.60 mmol), 0.20 g of trtrakis(triphenylphosphine) palladium (0.17 mmol), and 0.05 g of tetrabutyl ammonium bromide (0.16 mmol) were added and stirred at reflux for 12 h under N<sub>2</sub> protection. Then the system was extracted with methylene chloride and the separated organic layer was dried over anhydrous magnesium sulfate. The resultant residue was purified via column chromatography (PE/EA of 100/1) to obtain DFDM.

Table s1. Comparison of IEC, WU,  $\sigma$ ,  $P_M$  and  $\varphi$  among AEMs.

| Membrane                | IEC<br>(mequiv g <sup>-1</sup> ) | WU <sup>a</sup><br>(%) | $\sigma$ (mS/cm) <sup>b</sup> |          | $P_M$ <sup>c</sup><br>(10 <sup>-7</sup> cm <sup>2</sup> s <sup>-1</sup> ) | 10 <sup>-4</sup> $\varphi$<br>(S s cm <sup>-3</sup> ) | Ref. |
|-------------------------|----------------------------------|------------------------|-------------------------------|----------|---------------------------------------------------------------------------|-------------------------------------------------------|------|
|                         |                                  |                        | 25 °C                         | 80 °C    |                                                                           |                                                       |      |
| bQPAES-x7y32-1          | 1.15                             | 48.8                   | 30.4                          | 86.3     | 5.2                                                                       | 5.8 ×10 <sup>4</sup>                                  | This |
| bQPAES-x4y20-1          | 1.11                             | 45.8                   | 26.4                          | 81.8     | 4.8                                                                       | 5.5 ×10 <sup>4</sup>                                  | This |
| bQPAES-x7y24            | 0.81                             | 33.5                   | 23.6                          | 58.9     | 4.1                                                                       | 5.7 ×10 <sup>4</sup>                                  | This |
| bQPAES-x4y15            | 0.79                             | 30.9                   | 20.3                          | 54.8     | 3.7                                                                       | 5.4 ×10 <sup>4</sup>                                  | This |
| R1 rQPAES               | 1.20                             | 30.1                   | 21.0                          | 50.4     | 4.8                                                                       | 4.4 ×10 <sup>4</sup>                                  | This |
| R2 rQPE                 | 1.88                             | 95(30 °C)              | 20                            | 40       | —                                                                         | —                                                     | 31   |
| R3 QBPEs-60             | 1.86                             | 52                     | 27.5                          | 52.1     | —                                                                         | —                                                     | 37   |
| R4 QPAES-X20Y18         | 1.54                             | 57.2                   | 13.3                          | 64.1     | —                                                                         | —                                                     | 34   |
| R5 QBPEs-40             | 1.62                             | 36                     | 29                            | 48       | —                                                                         | —                                                     | 38   |
| R6 SEBS-TMA             | 2.41                             | 211(25 °C)             | 45(30 °C)                     | 102      | —                                                                         | —                                                     | 39   |
| R7 QPE-X16Y11           | 1.93                             | 112(30 °C)             | 96                            | 144      | —                                                                         | —                                                     | 31   |
| R8 bQAPDHTPE-OH20       | 1.66                             | 32(30 °C)              | 18(40 °C)                     | 21       | —                                                                         | —                                                     | 40   |
| R9 mPES-X6.7Y11.1       | 2.82                             | 57.50                  | 14.2                          | 29(60°C) | —                                                                         | —                                                     | 41   |
| R10 QPAE-X15Y15         | 1.91                             | 25(60 °C)              | 20.3                          | 45.4     | —                                                                         | —                                                     | 42   |
| R11 QPAE-a              | 2.38                             | 63                     | 25(20 °C)                     | 64.7     | —                                                                         | —                                                     | 12   |
| R12 QPPO-PAES-QPPO-1.14 | 1.83                             | 70                     | 63                            | 129      | —                                                                         | —                                                     | 43   |
| R13 AMBPE-76            | 2.74                             | 170                    | 56(30 °C)                     | 85(70°C) | —                                                                         | —                                                     | 44   |
| R14 ImPEEK-94           | 2.24                             | 63.31                  | 25(30 °C)                     | 57.80    | 46.1                                                                      | 1.37 ×10 <sup>4</sup>                                 | 45   |
| R15 ImPPESN-2.92        | 2.10                             | 70(60 °C)              | 35(30 °C)                     | 70       | —                                                                         | —                                                     | 46   |
| R16 ImPESN-19-22        | 2.07                             | 23(60 °C)              | 50(30 °C)                     | 110      | —                                                                         | —                                                     | 47   |
| R17 PI-cPES-50          | 1.21                             | 6.21                   | 30                            | 90       | 4.72                                                                      | 6.3 ×10 <sup>4</sup>                                  | 48   |
| R18 ImPSf-A             | 1.75                             | 102<br>(60 °C)         | 19.68<br>(20 °C)              | 55       | —                                                                         | —                                                     | 49   |

<sup>a</sup> At 80 °C. <sup>b</sup> In water at 25 (or 30 ) and 80 °C. <sup>c</sup> At 32 wt% methanol solution and 25 °C.

Table s2. Comparison of alkaline stability among AEMs.

| Membrane          | IEC<br>(mequiv g <sup>-1</sup> ) | Condition<br>(conc./base./temp.) | Time<br>(h) | $\sigma$ remaining <sup>a</sup> (%) | Ref. |
|-------------------|----------------------------------|----------------------------------|-------------|-------------------------------------|------|
| bQPAES-x7y32-1    | 1.15                             | 4M/NaOH/80 °C                    | 144         | 49.7                                | This |
|                   |                                  | 1M/KOH/80 °C                     | 144         | 84.1                                | This |
| bQPAES-x4y20-1    | 1.11                             | 4M/NaOH/80 °C                    | 144         | 47.8                                | This |
| bQPAES-x7y24      | 0.81                             | 4M/NaOH/80 °C                    | 144         | 51.5                                | This |
| bQPAES-x4y15      | 0.79                             | 4M/NaOH/80 °C                    | 144         | 52.8                                | This |
| R1 rQPAES         | 1.20                             | 1M/NaOH/80 °C                    | 144         | 38.0                                | This |
|                   |                                  | 4M/NaOH/80 °C                    | 144         | 24.7                                | This |
| R3 QBPEs-60       | 1.26                             | 1M/KOH/60 °C                     | 240         | 23.7(60 °C)                         | 37   |
| R4 QPAES-X20Y18   | 1.57                             | 1M/NaOH/60 °C                    | 168         | 72.1(60 °C)                         | 34   |
| R8 bQAPDHTPE-OH20 | 1.89                             | 1M/NaOH/60 °C                    | 240         | 60.8                                | 40   |
| R10 QPAE-X15Y15   | 1.91                             | 1M/KOH/60 °C                     | 168         | 91.7(60 °C)                         | 42   |
| R15 ImPPESN-2.92  | 2.10                             | 2M/NaOH/60 °C                    | 200/600     | 57.0/51.0<br>(30 °C)                | 46   |
| R16 ImPESN-19-22  | 2.07                             | 2M/NaOH/60 °C                    | 200/600     | 70.0/60.0<br>(20 °C)                | 47   |
| R17 PI-cPES-50    | 1.21                             | 2M/KOH/60 °C                     | 240/840     | 100/93.3<br>(25 °C)                 | 48   |
| R18 ImPSf-A       | 1.75                             | 3M/NaOH/25 °C                    | 168         | 82.4(25 °C)                         | 49   |

<sup>a</sup> At 80 °C.

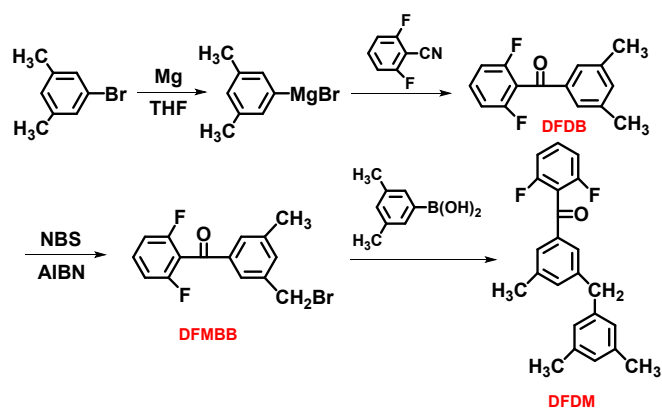

Figure s1. Synthesis of DFDM.

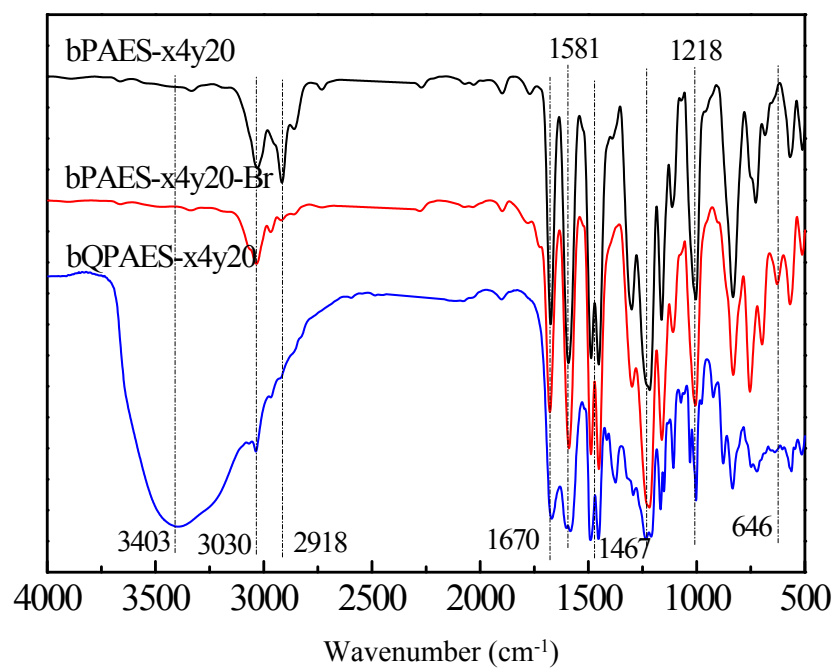

Figure s2. IR spectra of bPAES-x4y20, bPAES-x4y20-Br and bQPAES-x4y20.

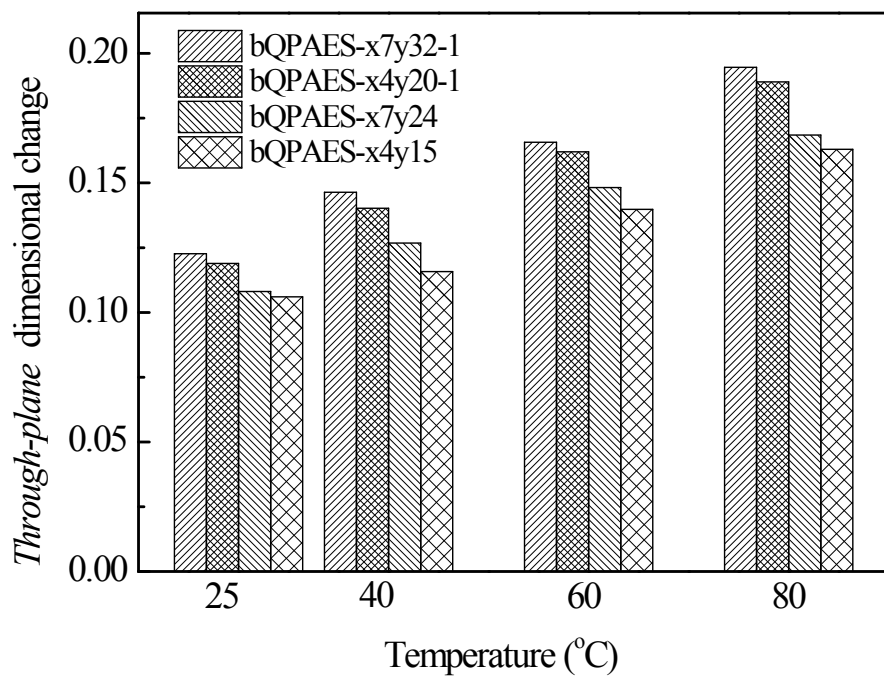

Figure s3. *Through-plane* dimensional change of block bQPAES.

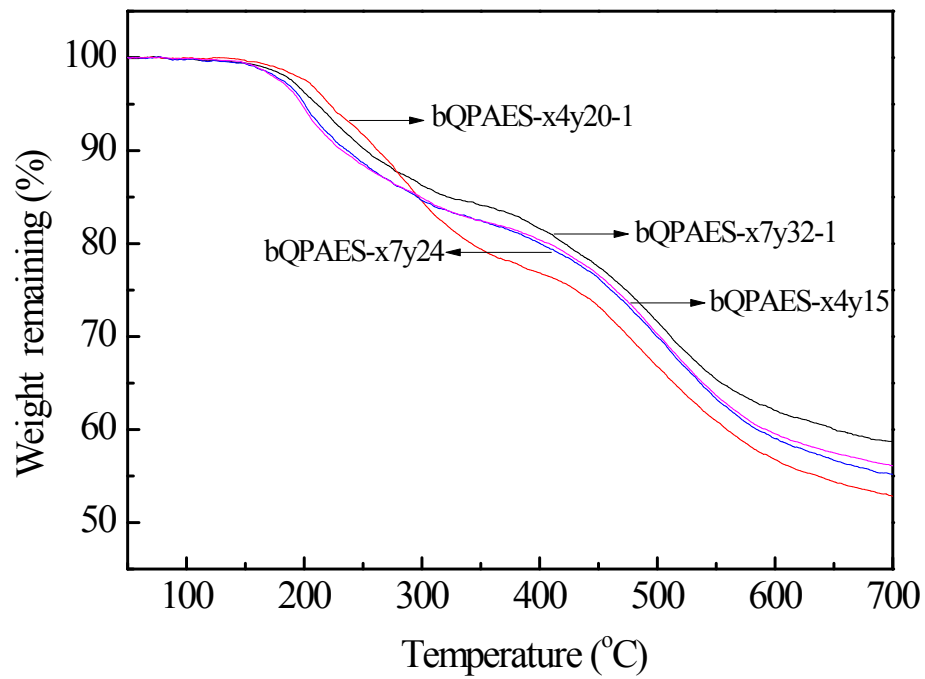

Figure s4. TGA curves of block bQPAES.



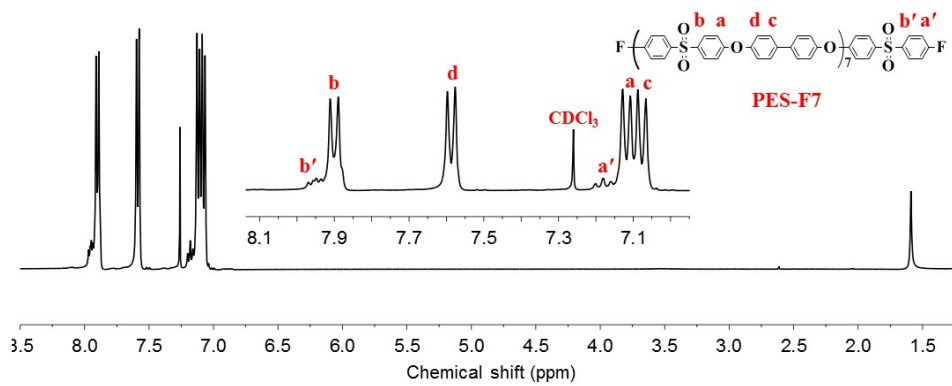

Figure s5. <sup>1</sup>H-NMR spectra of PAES-F7.

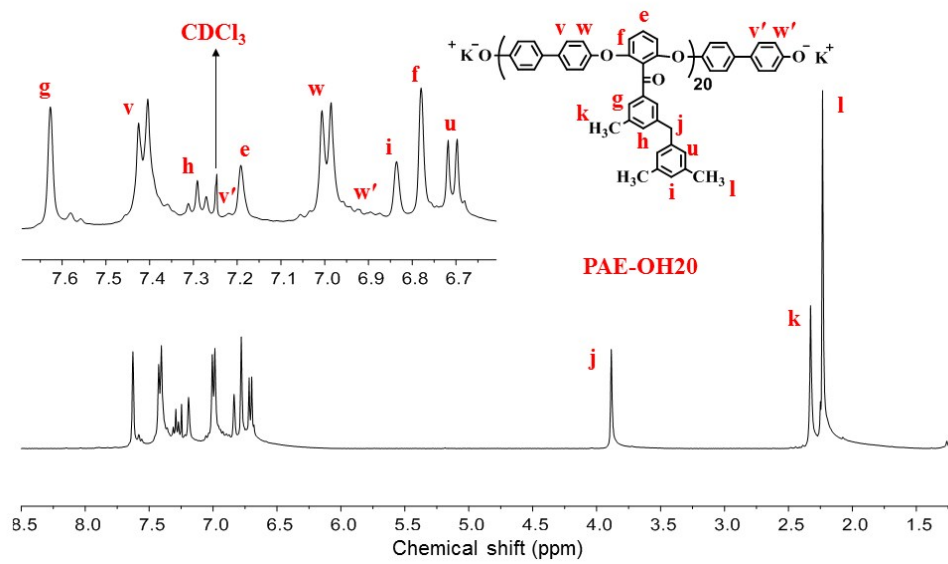

Figure s6.  $^1\text{H-NMR}$  spectra of PAE-OH20.

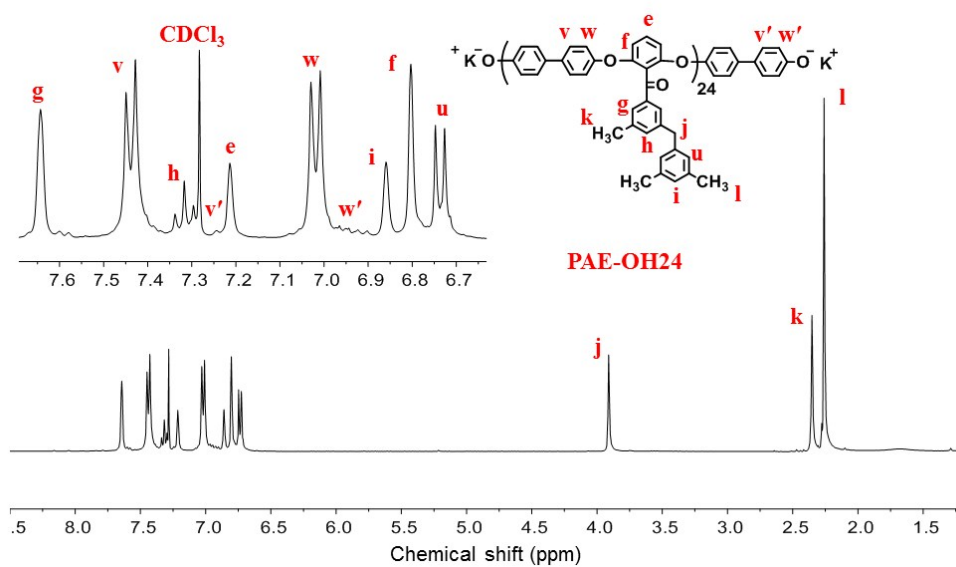

Figure s7. <sup>1</sup>H-NMR spectra of PAE-OH24.

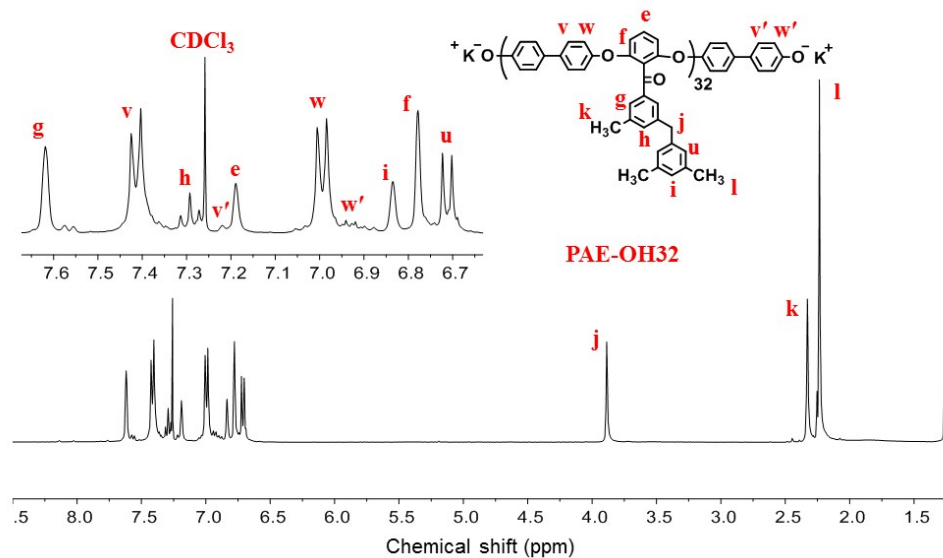

Figure s8.  $^1\text{H-NMR}$  spectra of PAE-OH32.
